# Supplementary material for: Short-term adaptation as a tool to improve bioethanol production using grass press-juice as fermentation medium
Source: PubMed Central journal article supplement (PMC11199226; doi:10.1007/s00253-024-13224-0), 2024-06-25
Supplement: 253_2024_13224_MOESM1_ESM.pdf [file 253_2024_13224_MOESM1_ESM.pdf]

1 **Applied Microbiology and Biotechnology**

2 Short-term adaptation as a tool to improve bioethanol production using  
3 grass press-juice as fermentation medium

4 Ludovica Varriale, Doris Geib, Roland Ulber\*

5 Rhein-Palatinate Technical University Kaiserslautern-Landau; Department of Mechanical and  
6 Process Engineering, Division of Bioprocess Engineering, Gottlieb-Daimler-Str. 49, 67663  
7 Kaiserslautern

8 \*corresponding author

9 ulber@mv.uni-kl.de

10 Tel.: +49 631 205-4043/-4044

11 Fax: +49 631 205-4312

12

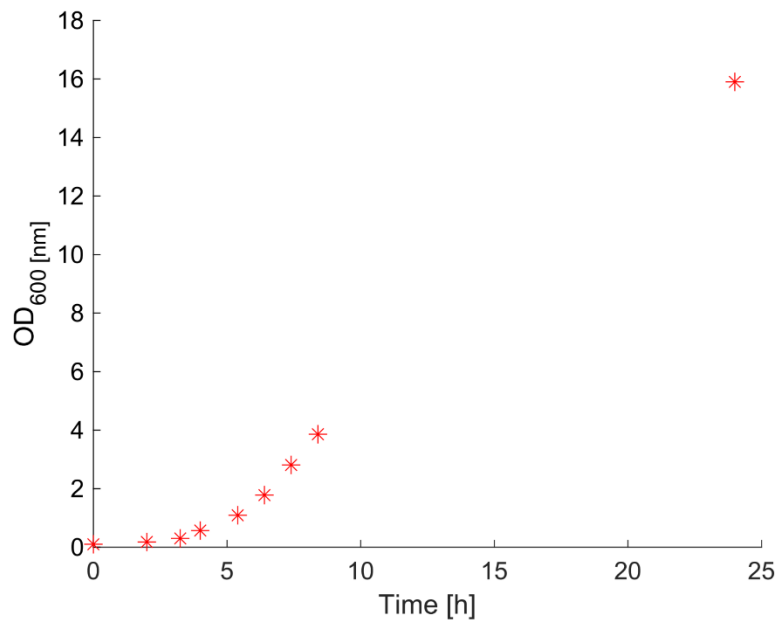

13

14 **Fig. S1** Growth curve of *Saccharomyces cerevisiae* in YPD medium. Growth conditions: 120 rpm,  
15 32°C, pH 6.2

16

17

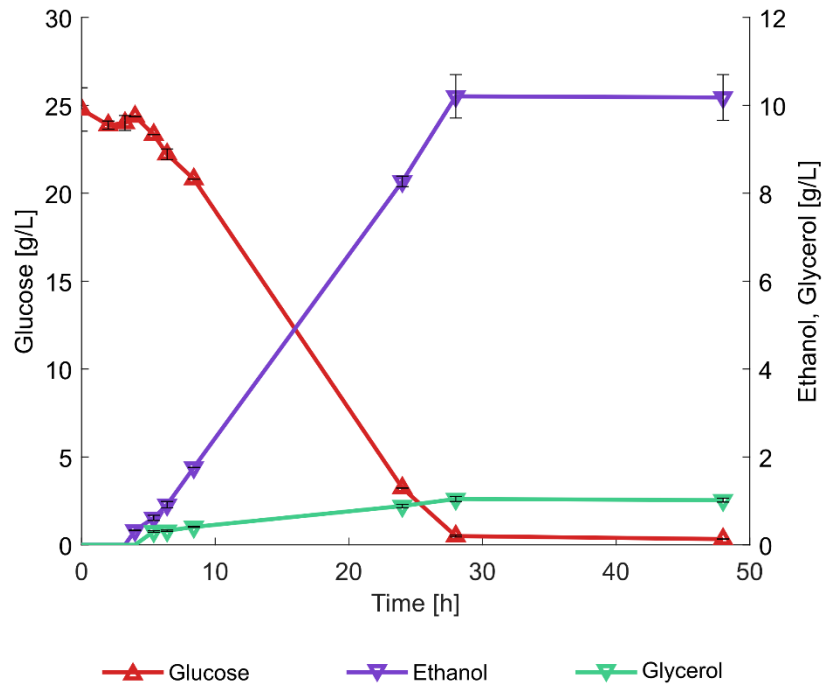

18

19 **Fig. S2** Glucose consumption and bioethanol production in YPD medium. Growth conditions: 120  
 20 rpm, 32°C, pH 6.2

21
